# Supplementary material for: Flavonoids from Agrimonia pilosa Ledeb: Free Radical Scavenging and DNA Oxidative Damage Protection Activities and Analysis of Bioactivity-Structure Relationship Based on Molecular and Electronic Structures
Source: PubMed Central journal article supplement (PMC6155215; doi:10.3390/molecules22030195), 2017-02-26
Supplement: molecules-22-00195-s001.pdf [file molecules-22-00195-s001.pdf]

# Supplementary Materials: Flavonoids from *Agrimonia pilosa* Ledeb: Free Radical Scavenging and DNA Oxidative Damage Protection Activities and Analysis of Bioactivity-Structure Relationship Based on Molecular and Electronic Structures

Liancai Zhu, Jinqui Chen, Jun Tan, Xi Liu and Bochu Wang

Table S1. <sup>1</sup>H-NMR data of isolated flavonoids from *Agrimonia pilosa* Ledeb.

| Position | Catechin                                                | Taxifolin             | Kaempferol    | Apigenin      | Luteolin      | Quercetin     | Quercitrin    | Hyperoside    | Rutin         | Tiliroside          | Kaempferol-3-O-glucoside | Luteolin-7-O-β-glucoside | Vitexin       | Isovitexin    |
|----------|---------------------------------------------------------|-----------------------|---------------|---------------|---------------|---------------|---------------|---------------|---------------|---------------------|--------------------------|--------------------------|---------------|---------------|
| 2        | δ4.48 (1 H, d, 7.5)                                     | δ4.98(d, 11.0)        |               |               |               |               |               |               |               |                     |                          |                          |               |               |
| 3        | 3.81 (1 H, m)                                           | δ4.50(dd, 11.0, 6.0); | 10.12 (s, OH) | 6.76 (s)      | 6.68 (s)      | 10.03 (s, OH) |               |               |               |                     |                          | 6.75 (1H, s)             | 6.28 (s)      | 6.48 (s)      |
| 4        | δ2.64 (1 H, dd, 16.0, 5.0 Hz) 、2.34(1 H, dd, 16.0, 8.0) | δ5.82 (d, 6.0, OH)    |               |               |               |               |               |               |               |                     |                          |                          |               |               |
| 5        |                                                         |                       | 12.49(s, OH)  | 12.95(s, OH)  | 12.99 (s, OH) | 12.41 (s, OH) | 12.69 (s, OH) | 12.71 (s, OH) | 12.69 (s, OH) | 12.59(s, OH)        | 12.51(s, OH)             | 13.01 (s, OH)            | 13.17(s, OH)  | 13.15(s, OH)  |
| 6        | 5.69 (1 H, d, 2.0)                                      | 11.90 (s, OH)         | 6.44 (d, 2.0) | 6.47 (d, 2.0) | 6.19 (d, 2.0) | 6.20 (d, 2.0) | 6.25 (d, 2.0) | 6.20 (d, 2.0) | 6.20 (d, 2.0) | 6.40 (d, 2.0)       | 6.43 (d, 2.0)            | 6.44 (d, 2.0)            | 6.78 (s)      |               |
| 7        |                                                         | δ5.88(d, 1.5)         | 10.80 (s, OH) |               |               | 10.61 (s, OH) | 10.89 (s, OH) | 10.78 (s, OH) | 10.77 (s, OH) | 10.86 (s, OH)       | 10.78 (s, OH)            |                          | 10.84 (s, OH) | 10.79 (s, OH) |
| 8        | 5.89 (1 H, d, 2.0)                                      | 11.00 (s, OH)         | 6.19 (d, 1.5) | 6.17 (d, 2.0) | 6.45 (d, 2.0) | 6.44 (d, 2.0) | 6.43 (d, 2.0) | 6.42 (d, 2.0) | 6.40 (d, 2.0) | 6.16 (d, 2.0)       | 6.19 (d, 2.0)            | 6.64 (d, 2.0)            |               | 6.76 (s)      |
| 9        |                                                         | δ5.93(d, 1.5)         |               |               |               |               |               |               |               |                     |                          |                          |               |               |
| 10       |                                                         |                       |               |               |               |               |               |               |               |                     |                          |                          |               |               |
| 1'       |                                                         |                       |               |               |               |               |               |               |               |                     |                          |                          |               |               |
| 2'       | δ6.73 (1 H, d, 2.0)                                     | 6.76(q)               | 8.04 (d, 8.5) | 7.91 (d, 9.0) | 7.43 (d, 2.0) | 7.35 (d, 2.0) | 7.35 (d, 2.0) | 7.35 (d, 2.0) | 7.61 (d, 2.0) | 7.99 (dd, 2.0, 9.0) | 8.03 (d, 8.5)            | 7.44 (d, 2.0)            | 8.02 (d, 8.5) | 7.99 (d, 8.5) |
| 3'       |                                                         | 9.15 (s)              | 6.92(d)       | 6.91(d)       |               | 9.26 (s)      | 9.38 (s)      | 9.36 (s)      | 9.62 (s)      | 6.86(dd)            | 6.91(d)                  |                          | 6.88 (d)      | 6.86 (d)      |

|      |                            |                        |                         |                  |                        |                        |                        |                        |                        |                               |                         |                       |                          |                          |
|------|----------------------------|------------------------|-------------------------|------------------|------------------------|------------------------|------------------------|------------------------|------------------------|-------------------------------|-------------------------|-----------------------|--------------------------|--------------------------|
| 4'   |                            | OH)<br>9.09 (s,<br>OH) | 8.5)<br>9.41 (s,<br>OH) | 8.5)             |                        | OH)<br>9.52 (s,<br>OH) | OH)<br>9.74 (s,<br>OH) | OH)<br>9.69 (s,<br>OH) | OH)<br>9.13(s,<br>OH)  | 2.0, 9.0)<br>10.17 (s,<br>OH) | 8.5)<br>9.39 (s,<br>OH) |                       | 9.0)<br>10.35 (s,<br>OH) | 9.0)<br>10.41 (s,<br>OH) |
| 5'   | 6.67 (1H,<br>d, 8.5)       | 6.76(q)                | 6.92 (d,<br>8.5)        | 6.91 (d,<br>8.5) | 6.89 (d,<br>8.5)       | 6.91 (d,<br>8.5)       | 6.91 (d,<br>8.5)       | 6.87 (d,<br>8.5)       | 6.83 (d,<br>8.5)       | 6.86(dd,<br>2.0, 9.0)         | 6.91(d,<br>8.5)         | 6.91 (d,<br>8.5)      | 6.88 (d,<br>9.0)         | 6.86 (d,<br>9.0)         |
| 6'   | 6.59 (1 H,<br>dd, 8.5,2.0) | 6.89 (s)               | 8.04(d,<br>8.5)         | 7.91(d,<br>9.0)  | 7.40 (dd,<br>8.5, 2.0) | 7.29 (dd,<br>8.5, 2.0) | 7.29 (dd,<br>8.5, 2.0) | 7.58 (dd,<br>8.5, 2.0) | 7.59 (dd,<br>2.0, 8.5) | 7.99(dd,<br>2.0, 9.0)         | 8.03(d,<br>8.5)         | 7.47(dd,<br>8.5, 2.0) | 8.02 (d,<br>8.5)         | 7.99(d,<br>8.5)          |
| 1''  |                            |                        |                         |                  |                        |                        |                        |                        |                        |                               |                         |                       |                          |                          |
| 2''  |                            |                        |                         |                  |                        |                        |                        |                        |                        |                               |                         |                       |                          |                          |
| 3''  |                            |                        |                         |                  |                        |                        |                        |                        |                        |                               |                         |                       |                          |                          |
| 4''  |                            |                        |                         |                  |                        |                        |                        |                        |                        |                               |                         |                       |                          |                          |
| 5''  |                            |                        |                         |                  |                        |                        |                        |                        |                        |                               |                         |                       |                          |                          |
| 6''  |                            |                        |                         |                  |                        |                        |                        | 0.83 (d,<br>6.0)       |                        |                               |                         |                       |                          |                          |
| 1''' |                            |                        |                         |                  |                        |                        |                        |                        |                        |                               |                         |                       |                          |                          |
| 2''' |                            |                        |                         |                  |                        |                        |                        |                        |                        | 6.11(d,<br>16.0)              |                         |                       |                          |                          |
| 3''' |                            |                        |                         |                  |                        |                        |                        |                        |                        | 7.34(d,<br>16.0)              |                         |                       |                          |                          |
| 4''' |                            |                        |                         |                  |                        |                        |                        |                        |                        |                               |                         |                       |                          |                          |
| 5''' |                            |                        |                         |                  |                        |                        |                        |                        |                        | 7.37(d,<br>8.5)               |                         |                       |                          |                          |
| 6''' |                            |                        |                         |                  |                        |                        |                        |                        |                        | 6.79(d,<br>8.5)               |                         |                       |                          |                          |
| 7''' |                            |                        |                         |                  |                        |                        |                        |                        |                        | 10.03 (s,<br>OH)              |                         |                       |                          |                          |
| 8''' |                            |                        |                         |                  |                        |                        |                        |                        |                        | 6.79(d,<br>8.5)               |                         |                       |                          |                          |
| 9''' |                            |                        |                         |                  |                        |                        |                        |                        |                        | 7.37(d,<br>8.5)               |                         |                       |                          |                          |

Table S2. <sup>13</sup>C-NMR data of isolated flavonoids from *Agrimonia pilosa* Ledeb.

| Position | Catechin | Taxifolin | Kaempferol | Apigenin | Luteolin | Quercetin | Quercitrin | Hyperoside | Rutin  | Tiliroside | Kaempferol-3-O-glucoside | Luteolin-7-O-β-glucoside | Vitexin | Isovitexin |
|----------|----------|-----------|------------|----------|----------|-----------|------------|------------|--------|------------|--------------------------|--------------------------|---------|------------|
| 2        | 81.05    | 83.26     | 146.21     | 164.42   | 163.87   | 146.84    | 156.54     | 156.46     | 156.78 | 156.34     | 155.98                   | 163.88                   | 163.9   | 163.7      |
| 3        | 66.37    | 71.74     | 135.65     | 102.85   | 102.85   | 135.82    | 134.32     | 133.52     | 133.54 | 133.06     | 133.03                   | 102.93                   | 102.41  | 102.62     |
| 4        | 27.89    | 197.94    | 175.89     | 181.77   | 181.64   | 175.64    | 177.84     | 177.56     | 177.63 | 177.39     | 177.84                   | 181.53                   | 182.05  | 181.95     |
| 5        | 156.52   | 163.49    | 160.69     | 161.48   | 161.45   | 160.43    | 161.39     | 161.28     | 161.39 | 161.14     | 156.56                   | 160.81                   | 161.09  | 161.16     |

|      |        |        |         |        |        |        |        |        |        |        |        |        |        |        |
|------|--------|--------|---------|--------|--------|--------|--------|--------|--------|--------|--------|--------|--------|--------|
| 6    | 95.18  | 96.22  | 98.18   | 98.95  | 98.8   | 98.08  | 98.78  | 98.71  | 98.88  | 98.75  | 98.21  | 99.59  | 98.1   | 108.1  |
| 7    | 156.25 | 166.98 | 163.87  | 163.78 | 164.11 | 163.36 | 164.26 | 164.13 | 164.15 | 164.14 | 163.78 | 163.02 | 162.53 | 163.45 |
| 8    | 93.92  | 95.19  | 93.46   | 94.06  | 93.82  | 93.31  | 93.71  | 93.38  | 93.73  | 93.65  | 93.49  | 94.71  | 104.57 | 93.87  |
| 9    | 155.42 | 162.74 | 156.16  | 157.38 | 157.27 | 156.29 | 157.39 | 156.38 | 156.56 | 156.43 | 161.03 | 156.81 | 155.96 | 156.09 |
| 10   | 99.132 | 100.66 | 103.02  | 103.65 | 103.67 | 102.36 | 104.19 | 104.05 | 104.26 | 103.87 | 103.14 | 104.92 | 104.01 | 103.87 |
| 1'   | 130.66 | 128.2  | 121.65  | 121.2  | 118.97 | 121.25 | 121.22 | 121.43 | 121.77 | 120.76 | 121.37 | 119.07 | 121.58 | 121.08 |
| 2'   | 114.57 | 115.49 | 129.49  | 128.52 | 113.34 | 115.13 | 115.56 | 115.26 | 115.37 | 130.8  | 129.26 | 113.02 | 128.92 | 128.53 |
| 3'   | 144.9  | 145.13 | 115.43  | 116.04 | 145.71 | 145.17 | 145.27 | 144.91 | 144.93 | 115.74 | 115.36 | 145.16 | 115.77 | 116.03 |
| 4'   | 144.9  | 145.96 | 159.18  | 161.24 | 149.68 | 147.45 | 148.5  | 148.38 | 148.55 | 159.97 | 159.64 | 149.09 | 160.35 | 160.85 |
| 5'   | 115.16 | 115.96 | 115.43  | 116.04 | 115.99 | 115.46 | 115.77 | 116.16 | 116.46 | 115.74 | 115.36 | 115.61 | 115.77 | 116.03 |
| 6'   | 118.52 | 119.68 | 129.492 | 128.52 | 120.07 | 120.07 | 120.87 | 121.31 | 121.36 | 130.8  | 129.26 | 119.83 | 128.92 | 128.53 |
| 1''  |        |        |         |        |        |        | 101.89 | 102.13 | 101.33 | 100.96 | 101.36 | 100.03 | 78.63  | 79.32  |
| 2''  |        |        |         |        |        |        | 70.47  | 71.41  | 74.33  | 76.22  | 74.23  | 73.26  | 73.34  | 73.63  |
| 3''  |        |        |         |        |        |        | 70.67  | 73.36  | 76.54  | 74.22  | 76.49  | 76.89  | 70.8   | 71.06  |
| 4''  |        |        |         |        |        |        | 71.3   | 68.09  | 70.16  | 69.96  | 70.08  | 69.91  | 70.51  | 70.76  |
| 5''  |        |        |         |        |        |        | 70.15  | 75.75  | 75.98  | 74.11  | 77.26  | 77.34  | 81.8   | 81.63  |
| 6''  |        |        |         |        |        |        | 17.57  | 60.62  | 67.12  | 62.95  | 61.21  | 61.23  | 61.26  | 61.56  |
| 1''' |        |        |         |        |        |        |        |        | 100.88 | 166.15 |        |        |        |        |
| 2''' |        |        |         |        |        |        |        |        | 70.49  | 113.63 |        |        |        |        |
| 3''' |        |        |         |        |        |        |        |        | 70.72  | 144.57 |        |        |        |        |
| 4''' |        |        |         |        |        |        |        |        | 71.88  | 124.92 |        |        |        |        |
| 5''' |        |        |         |        |        |        |        |        | 69.41  | 130.12 |        |        |        |        |
| 6''' |        |        |         |        |        |        |        |        | 17.78  | 115.07 |        |        |        |        |
| 7''' |        |        |         |        |        |        |        |        |        | 159.77 |        |        |        |        |
| 8''' |        |        |         |        |        |        |        |        |        | 115.07 |        |        |        |        |
| 9''' |        |        |         |        |        |        |        |        |        | 130.12 |        |        |        |        |

Table S3. ESI-MS ( $m/z$ ) data of isolated flavonoids from *Agrimonia pilosa* Ledeb.

|                      | Catechin | Taxifolin | Kaempferol | Apigenin | Luteolin | Quercetin | Quercitrin | Hyperoside | Rutin | Tiliroside | Kaempferol-3-O-glucoside | Luteolin-7-O- $\beta$ -glucoside | Vitexin | Isovitexin |
|----------------------|----------|-----------|------------|----------|----------|-----------|------------|------------|-------|------------|--------------------------|----------------------------------|---------|------------|
| [M + H] <sup>+</sup> | 291      | 305       | 287        | 271      | 287      | 303       | 449        | 465        | 611   | 595        | 449                      | 449                              | 433     | 433        |
